# Supplementary material
Source: MDPI journal article supplement (https://www.mdpi.com/2071-1050/13/20/11335)
Supplement: s1 [file s1 › sustainability-1422225-supplementary.pdf]

**Table S1.** The survey instrument.

**A. WILDLIFE VALUE ORIENTATIONS**

Please select a box for indicating how strongly do you agree with each of the following statements.

| Statements                                                                                            | Strongly disagree |   |   | Neither |   | Strongly agree |   |
|-------------------------------------------------------------------------------------------------------|-------------------|---|---|---------|---|----------------|---|
|                                                                                                       | 1                 | 2 | 3 | 4       | 5 | 6              | 7 |
| Humans should manage fish and wildlife populations so that humans benefit.                            |                   |   |   |         |   |                |   |
| The needs of humans should take priority over fish and wildlife protection.                           |                   |   |   |         |   |                |   |
| It is acceptable for people to kill wildlife if they think it poses a threat to their life.           |                   |   |   |         |   |                |   |
| It is acceptable for people to kill wildlife if they think it poses a threat to their property.       |                   |   |   |         |   |                |   |
| It is acceptable to use fish and wildlife in research even if it may harm or kill some animals.       |                   |   |   |         |   |                |   |
| Fish and wildlife are on earth primarily for people to use.                                           |                   |   |   |         |   |                |   |
| We should strive for a world where there's an abundance of fish and wildlife for hunting and fishing. |                   |   |   |         |   |                |   |
| Hunting is cruel and inhumane to the animals.                                                         |                   |   |   |         |   |                |   |
| Hunting does not respect the lives of animals.                                                        |                   |   |   |         |   |                |   |
| People who want to hunt should be provided the opportunity to do so.                                  |                   |   |   |         |   |                |   |
| We should strive for a world where humans and fish and wildlife can live side by side without fear.   |                   |   |   |         |   |                |   |
| I view all living things as part of one big family.                                                   |                   |   |   |         |   |                |   |
| Animals should have rights similar to the rights of humans.                                           |                   |   |   |         |   |                |   |
| Wildlife are like my family and I want to protect them.                                               |                   |   |   |         |   |                |   |
| I care about animals as much as I do other people.                                                    |                   |   |   |         |   |                |   |
| It would be more rewarding to me to help animals rather than people.                                  |                   |   |   |         |   |                |   |
| I take great comfort in the relationships I have with animals.                                        |                   |   |   |         |   |                |   |
| I feel a strong emotional bond with animals.                                                          |                   |   |   |         |   |                |   |
| I value the sense of companionship I receive from animals.                                            |                   |   |   |         |   |                |   |

## B. WILDLIFE MANAGEMENT STRATEGIES

### **B1. Brown bears damage crops**

Brown bears are threatened mammals that may visit crops to feed. When they cause significant damage, how acceptable or unacceptable would be for you to (please check a box for each strategy):

|                                                                   | Acceptable               |  | Unacceptable             |
|-------------------------------------------------------------------|--------------------------|--|--------------------------|
| Take no action.                                                   | <input type="checkbox"/> |  | <input type="checkbox"/> |
| Award suitable compensation.                                      | <input type="checkbox"/> |  | <input type="checkbox"/> |
| Use fencing for the protection of crops.                          | <input type="checkbox"/> |  | <input type="checkbox"/> |
| Trap and relocate nuisance animals.                               | <input type="checkbox"/> |  | <input type="checkbox"/> |
| Reduce populations through shooting carried out by state experts. | <input type="checkbox"/> |  | <input type="checkbox"/> |

### **B2. Brown bears attack domestic animals**

Brown bears are threatened mammals that may attack domestic animals to feed. When they cause significant damage, how acceptable or unacceptable would be for you to (please check a box for each strategy):

|                                                                   | Acceptable               |  | Unacceptable             |
|-------------------------------------------------------------------|--------------------------|--|--------------------------|
| Take no action.                                                   | <input type="checkbox"/> |  | <input type="checkbox"/> |
| Award suitable compensation.                                      | <input type="checkbox"/> |  | <input type="checkbox"/> |
| Use fencing for the protection of crops.                          | <input type="checkbox"/> |  | <input type="checkbox"/> |
| Trap and relocate nuisance animals.                               | <input type="checkbox"/> |  | <input type="checkbox"/> |
| Reduce populations through shooting carried out by state experts. | <input type="checkbox"/> |  | <input type="checkbox"/> |

### **B3. Red foxes attack domestic animals**

Red foxes are common mammals that may attack domestic animals to feed. When they cause significant damage, how acceptable or unacceptable would be for you to (please check a box for each strategy):

|                                                                   | Acceptable               |  | Unacceptable             |
|-------------------------------------------------------------------|--------------------------|--|--------------------------|
| Take no action.                                                   | <input type="checkbox"/> |  | <input type="checkbox"/> |
| Award suitable compensation.                                      | <input type="checkbox"/> |  | <input type="checkbox"/> |
| Use fencing for the protection of crops.                          | <input type="checkbox"/> |  | <input type="checkbox"/> |
| Destruct individuals at breeding sites.                           | <input type="checkbox"/> |  | <input type="checkbox"/> |
| Reduce populations through shooting carried out by state experts. | <input type="checkbox"/> |  | <input type="checkbox"/> |

**B4. Red foxes transmit disease**

Red foxes are common mammals, potential vectors of serious diseases, such as rabies. When they transfer such diseases to humans or their animals, mainly dogs, how acceptable or unacceptable would be for you to (please check a box for each strategy):

|                                                                   | Acceptable               | Unacceptable             |
|-------------------------------------------------------------------|--------------------------|--------------------------|
| Take no action.                                                   | <input type="checkbox"/> | <input type="checkbox"/> |
| Award suitable compensation.                                      | <input type="checkbox"/> | <input type="checkbox"/> |
| Vaccinate the population of concern.                              | <input type="checkbox"/> | <input type="checkbox"/> |
| Destruct individuals at breeding sites.                           | <input type="checkbox"/> | <input type="checkbox"/> |
| Reduce populations through shooting carried out by state experts. | <input type="checkbox"/> | <input type="checkbox"/> |

**B5. Coypus damage crops**

Coypus are exotic mammals, that feed on plant material and may visit crops to feed. When they cause significant damage, how acceptable or unacceptable would be for you to (please check a box for each strategy):

|                                                                   | Acceptable               | Unacceptable             |
|-------------------------------------------------------------------|--------------------------|--------------------------|
| Take no action.                                                   | <input type="checkbox"/> | <input type="checkbox"/> |
| Award suitable compensation.                                      | <input type="checkbox"/> | <input type="checkbox"/> |
| Provide alternative food sources.                                 | <input type="checkbox"/> | <input type="checkbox"/> |
| Destruct individuals at breeding sites.                           | <input type="checkbox"/> | <input type="checkbox"/> |
| Reduce populations through shooting carried out by state experts. | <input type="checkbox"/> | <input type="checkbox"/> |

**B6. Coypus transmit disease**

Coypus are exotic mammals, potential vectors of serious diseases. When they transfer such diseases to humans or their animals how acceptable or unacceptable would be for you to (please check a box for each strategy):

|                                                                   | Acceptable               | Unacceptable             |
|-------------------------------------------------------------------|--------------------------|--------------------------|
| Take no action.                                                   | <input type="checkbox"/> | <input type="checkbox"/> |
| Award suitable compensation.                                      | <input type="checkbox"/> | <input type="checkbox"/> |
| Provide alternative food sources.                                 | <input type="checkbox"/> | <input type="checkbox"/> |
| Destruct individuals at breeding sites.                           | <input type="checkbox"/> | <input type="checkbox"/> |
| Reduce populations through shooting carried out by state experts. | <input type="checkbox"/> | <input type="checkbox"/> |
